# Supplementary material
Source: PubMed Central journal article supplement (PMC2860110)

Supporting Information

for

**Vibrational Analysis of the Model Complex  $(\mu\text{-edt})[\text{Fe}(\text{CO})_3]_2$  and  
Comparison to Iron-only Hydrogenase:  
The Activation Scale of Hydrogenase Model Systems**

Mary Grace I. Galinato, C. Matthew Whaley, and  
Nicolai Lehnert

**Table S1.** Manually adjusted force constants in the QCC-NCA simulation of ( $\mu$ -edt)[Fe(CO)<sub>3</sub>]<sub>2</sub>, starting from the B3LYP/TZVP-calculated force field.

| Coordinate <sup>a</sup> | Force constant <sup>b</sup> |          |
|-------------------------|-----------------------------|----------|
|                         | Redong                      | QCC-NCA  |
| Fe(1)-S(3)              | 0.591586                    | 0.521586 |
| Fe(2)-S(3)              | 0.592404                    | 0.522404 |
| Fe(1)-S(4)              | 0.591597                    | 0.521597 |
| Fe(1)-S(4)              | 0.592437                    | 0.522437 |
| S(3)-C(20)              | 1.85367                     | 1.73367  |
| S(4)-C(17)              | 1.85376                     | 1.73376  |
| C(8)-Fe(1)-C(9)         | 0.459841                    | 0.325841 |
| C(6)-Fe(2)-C(7)         | 0.459954                    | 0.325954 |
| C(9)-Fe(1)-C(10)        | 0.266437                    | 0.125437 |
| C(8)-Fe(1)-C(10)        | 0.266475                    | 0.125475 |
| C(5)-Fe(2)-C(7)         | 0.267512                    | 0.126512 |
| C(5)-Fe(2)-C(6)         | 0.267380                    | 0.126380 |
| Fe(1)-S(3)-C(20)        | 0.370261                    | 0.380261 |
| Fe(1)-S(4)-C(17)        | 0.370314                    | 0.380314 |
| Fe(2)-S(3)-C(20)        | 0.366590                    | 0.376590 |
| Fe(2)-S(3)-C(17)        | 0.366526                    | 0.376526 |
| S(3)-C(20)-C(17)        | 0.461224                    | 0.671224 |
| S(4)-C(17)-C(20)        | 0.461233                    | 0.671233 |
| C(9)-Fe(1)-S(3)         | 0.283571                    | 0.305571 |
| C(8)-Fe(1)-S(4)         | 0.283577                    | 0.305577 |
| C(7)-Fe(2)-S(3)         | 0.292616                    | 0.314616 |
| C(6)-Fe(2)-S(4)         | 0.292680                    | 0.314680 |
|                         |                             |          |

<sup>a</sup>Atom numbers are shown in Figure 2. <sup>b</sup>The units for the force constants of stretching and linear bending are mdyn/Å and mdyn·Å, respectively.

**Table S2.** Cartesian coordinates [ $\text{\AA}$ ] for the DFT optimized geometry of  $(\mu\text{-edt})[\text{Fe}(\text{CO})_3]_2$  using B3LYP/TZVP.

|    |             |             |             |
|----|-------------|-------------|-------------|
| Fe | 1.26230900  | -0.17491200 | 0.00002500  |
| Fe | -1.26245100 | -0.17467900 | -0.00012900 |
| S  | -0.00003900 | 1.03969700  | 1.48548600  |
| S  | 0.00010800  | 1.03958800  | -1.48565700 |
| C  | -2.80750500 | 0.75012800  | 0.00002200  |
| C  | -1.63198200 | -1.36820500 | -1.30677200 |
| C  | -1.63183500 | -1.36799700 | 1.30673900  |
| C  | 1.63180600  | -1.36842900 | -1.30664200 |
| C  | 1.63192400  | -1.36815900 | 1.30690800  |
| C  | 2.80729100  | 0.74999000  | -0.00015600 |
| O  | -3.78776397 | 1.33687148  | 0.00011780  |
| O  | -1.86526950 | -2.12168629 | -2.13166484 |
| O  | -1.86503010 | -2.12134829 | 2.13177532  |
| O  | 1.86507147  | -2.12190279 | -2.13154800 |
| O  | 1.86526351  | -2.12146086 | 2.13194875  |
| O  | 3.78751628  | 1.33680093  | -0.00027084 |
| C  | 0.00007600  | 2.74545500  | -0.76290700 |
| H  | 0.88120200  | 3.24536000  | -1.16400400 |
| H  | -0.88156100 | 3.24496300  | -1.16336400 |
| C  | 0.00061400  | 2.74552800  | 0.76262300  |
| H  | -0.88033400 | 3.24577900  | 1.16367600  |
| H  | 0.88243300  | 3.24472800  | 1.16306100  |
| X  | -2.86302270 | 0.65753816  | -0.99413337 |
| X  | -2.29692774 | 1.60315542  | -0.10793672 |
| X  | -1.40431266 | -2.11836326 | -0.68594251 |
| X  | -0.67993866 | -1.33055461 | -1.61040984 |
| X  | -1.52894460 | -0.64810851 | 1.99316025  |
| X  | -0.65835340 | -1.58262495 | 1.38591236  |
| X  | 1.96847888  | -2.01433028 | -0.62146837 |
| X  | 2.55097906  | -0.98505552 | -1.39689536 |
| X  | 2.32601429  | -0.74967691 | 1.67530801  |
| X  | 2.32217019  | -1.79458806 | 0.72234110  |
| X  | 2.29406360  | 1.60730715  | 0.03990572  |
| X  | 2.78662739  | 0.78431152  | -0.99935320 |

Note: X represents anchor atoms for the definition of linear bending internal coordinates.

**Table S3.** Cartesian coordinates [ $\text{\AA}$ ] for the DFT optimized geometry of  $(\mu\text{-edt})[\text{Fe}(\text{CO})_3]_2$  using BP86/TZVP.

|    |             |             |             |
|----|-------------|-------------|-------------|
| Fe | 1.26985700  | -0.16670900 | -0.00060400 |
| Fe | -1.26986400 | -0.16668600 | 0.00059500  |
| S  | 0.00071000  | 1.01812800  | 1.47530200  |
| S  | -0.00069600 | 1.01811100  | -1.47532400 |
| C  | -2.80156600 | 0.74834300  | 0.00063600  |
| C  | -1.65972100 | -1.34970200 | -1.28367400 |
| C  | -1.65866900 | -1.34965500 | 1.28528500  |
| C  | 1.65864300  | -1.34972200 | -1.28526100 |
| C  | 1.65973200  | -1.34967700 | 1.28370400  |
| C  | 2.80155300  | 0.74832800  | -0.00066900 |
| O  | -3.79896800 | 1.33931400  | -0.00054300 |
| O  | -1.92865200 | -2.11671000 | -2.10751500 |
| O  | -1.92692400 | -2.11664000 | 2.10936000  |
| O  | 1.92689500  | -2.11673400 | -2.10931200 |
| O  | 1.92868800  | -2.11664200 | 2.10757800  |
| O  | 3.79892800  | 1.33934500  | 0.00052900  |
| C  | -0.00048500 | 2.73927200  | -0.76176500 |
| H  | 0.88985400  | 3.23369700  | -1.17446900 |
| H  | -0.89155200 | 3.23337800  | -1.17327400 |
| C  | 0.00053200  | 2.73928100  | 0.76172500  |
| H  | -0.88979900 | 3.23372500  | 1.17442400  |
| H  | 0.89160800  | 3.23337600  | 1.17322800  |

**Table S4.** Comparison of experimental and calculated (B3LYP and BP86 with basis set TZVP) vibrational frequencies of ( $\mu$ -edt)[Fe(CO)<sub>3</sub>]<sub>2</sub>, focusing on the  $\nu$ (C=O) and  $\nu$ (Fe-CO)/ $\delta$ (Fe-C=O) energy regions.

| Mode                              | Experimental [cm <sup>-1</sup> ]                      |                                                       | Calculated (DFT) [cm <sup>-1</sup> ] <sup>c</sup> |           |
|-----------------------------------|-------------------------------------------------------|-------------------------------------------------------|---------------------------------------------------|-----------|
|                                   | IR <sup>a</sup> ( <sup>12</sup> CO/ <sup>13</sup> CO) | rR <sup>b</sup> ( <sup>12</sup> CO/ <sup>13</sup> CO) | B3LYP/TZVP                                        | BP86/TZVP |
| $\nu$ (C=O)                       | 2078(2077)/2030                                       | 2070 / 2023                                           | 2153                                              | 2063      |
| $\nu$ (C=O)                       | 2038(2037)/1991                                       | 2005 / 1959                                           | 2105                                              | 2028      |
| $\nu$ (C=O)                       | 2008(1998)/1962                                       | 1979 / 1934                                           | 2095                                              | 2002      |
| $\nu$ (C=O)                       | 1995/1950                                             | 1968 / 1924                                           | 2083                                              | 1988      |
| $\nu$ (C=O)                       | not observed                                          | 1964 / 1919                                           | 2076                                              | 1985      |
| $\nu$ (C=O)                       | 1985/1940                                             | 1961 / 1917                                           | 2072                                              | 1979      |
| $\nu$ (Fe-CO) + $\delta$ (Fe-C=O) |                                                       | 630 / 615                                             | 636                                               | 637       |
| $\nu$ (Fe-CO) + $\delta$ (Fe-C=O) |                                                       | 592 / 579                                             | 601                                               | 609       |
| $\nu$ (Fe-CO) + $\delta$ (Fe-C=O) |                                                       | 572 / 562                                             | 578                                               | 588       |
| $\nu$ (Fe-CO) + $\delta$ (Fe-C=O) |                                                       | 565 / 556                                             | 571                                               | 584       |
| $\delta$ (Fe-C=O)                 |                                                       | 528 / 519                                             | 526                                               | 521       |
| $\nu$ (Fe-CO) + $\delta$ (Fe-C=O) |                                                       | 503 / 495                                             | 507                                               | 525       |
| $\nu$ (Fe-CO) + $\delta$ (Fe-C=O) |                                                       | 494 / 485                                             | 496                                               | 500       |
| $\nu$ (Fe-CO) + $\delta$ (Fe-C=O) |                                                       | 483 / 474                                             | 481                                               | 501       |
| $\nu$ (Fe-CO) + $\delta$ (Fe-C=O) |                                                       | 470 / 462                                             | 471                                               | 496       |
| $\nu$ (Fe-CO) + $\delta$ (Fe-C=O) |                                                       | 463 / 452                                             | 454                                               | 464       |
| $\nu$ (Fe-CO) + $\delta$ (Fe-C=O) |                                                       | 456 / 444                                             | 448                                               | 453       |
| $\nu$ (Fe-CO) + $\delta$ (Fe-C=O) |                                                       | 454 / 442                                             | 446                                               | 446       |
| $\nu$ (Fe-CO) + $\delta$ (Fe-C=O) |                                                       | 447 / 435                                             | 440                                               | 445       |
| $\delta$ (Fe-C=O)                 |                                                       | 419 / 406                                             | 416                                               | 413       |
| $\delta$ (Fe-C=O)                 |                                                       | 416 / 403                                             | 410                                               | 407       |

<sup>a</sup> Vibrational IR energies were obtained in hexane and acetonitrile (in parenthesis). <sup>b</sup> From resonance Raman measurements on a saturated solution in acetonitrile. <sup>c</sup> DFT calculations.

**Figure S1.** Diffuse reflectance Fourier transform infrared spectra of solid ( $\mu$ -edt)[Fe(CO)<sub>3</sub>]<sub>2</sub> and ( $\mu$ -edt)[Fe(<sup>13</sup>CO)<sub>3</sub>]<sub>2</sub>.

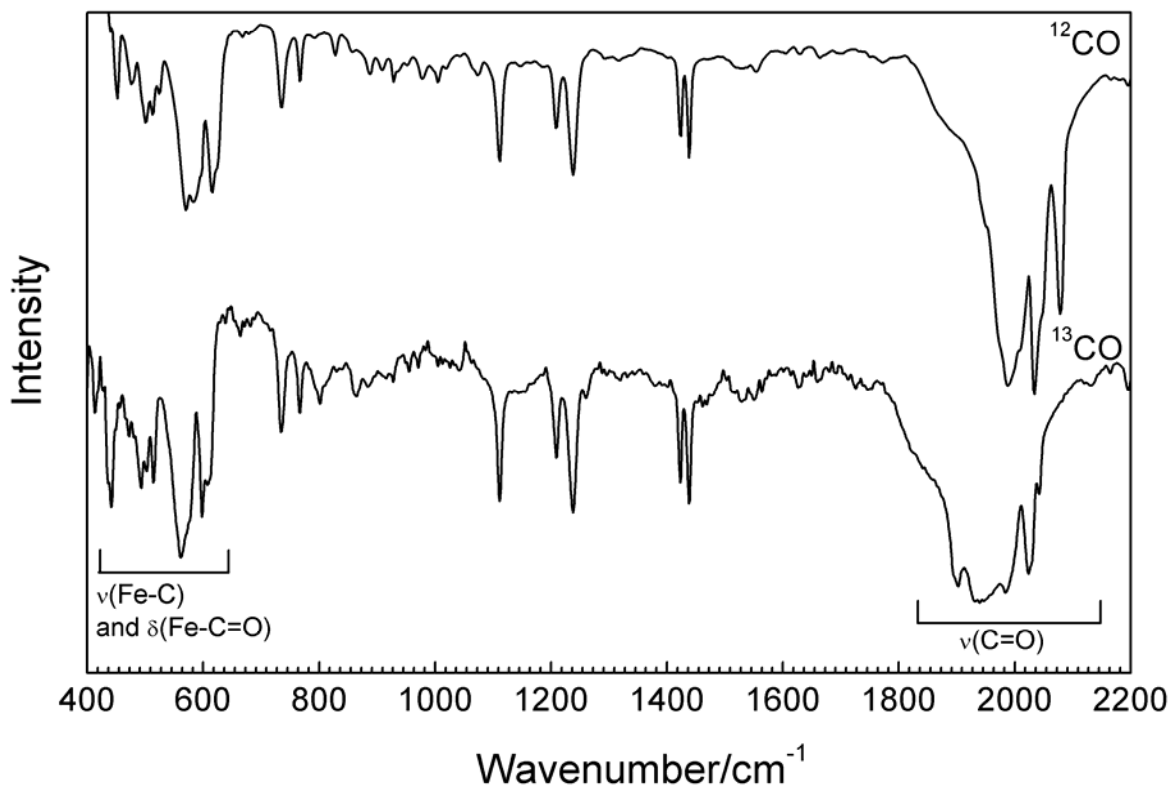

**Figure S2.** Comparison of experimental (in hexane, solid line) and B3LYP/TZVP calculated (column bar) IR spectra of  $(\mu\text{-edt})[\text{Fe}(\text{CO})_3]_2$ .

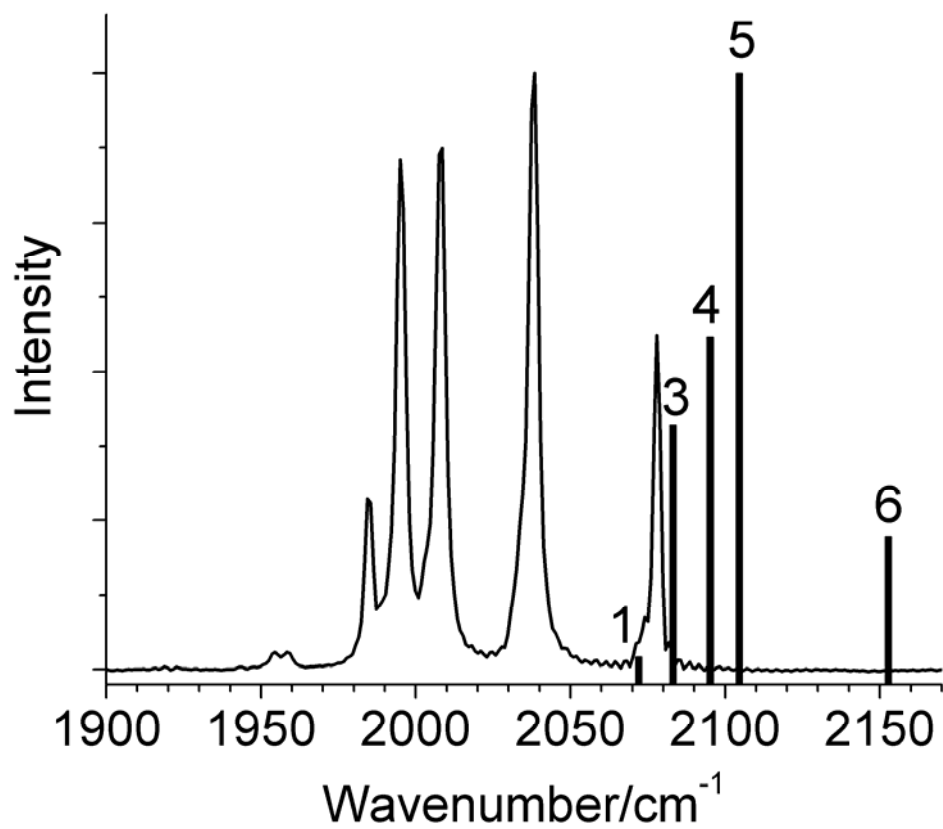

**Figure S3.** Comparison of experimental (in hexane, solid line) and BP86/TZVP calculated (column bar) IR spectra of  $(\mu\text{-edt})[\text{Fe}(\text{CO})_3]_2$ .

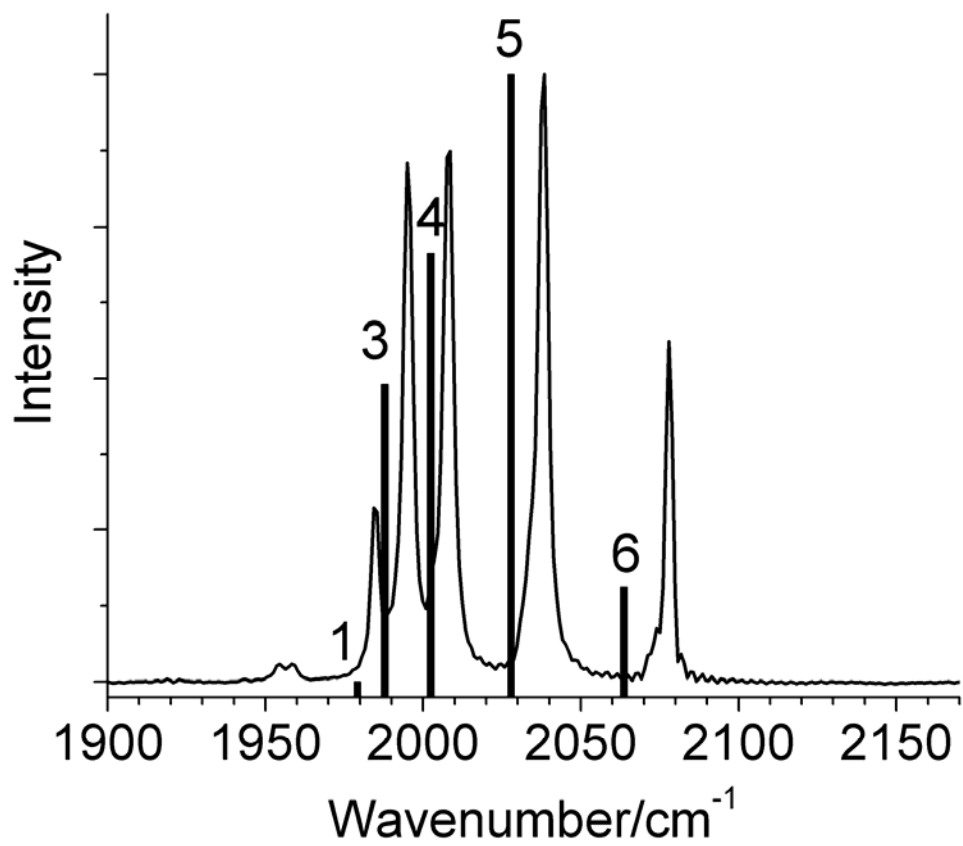



**Figure S4.** Overlay of the BP86/TZVP calculated (column bars) and experimental (solid lines) Raman spectra of  $(\mu\text{-edt})[\text{Fe}(\text{CO})_3]_2$  in acetonitrile in the A)  $\nu(\text{Fe-CO})/\delta(\text{Fe-C=O})$  and B)  $\nu(\text{C=O})$  regions. The DFT-calculated modes are labeled according to the corresponding experimental modes (refer to Figure 5 and Table S4).

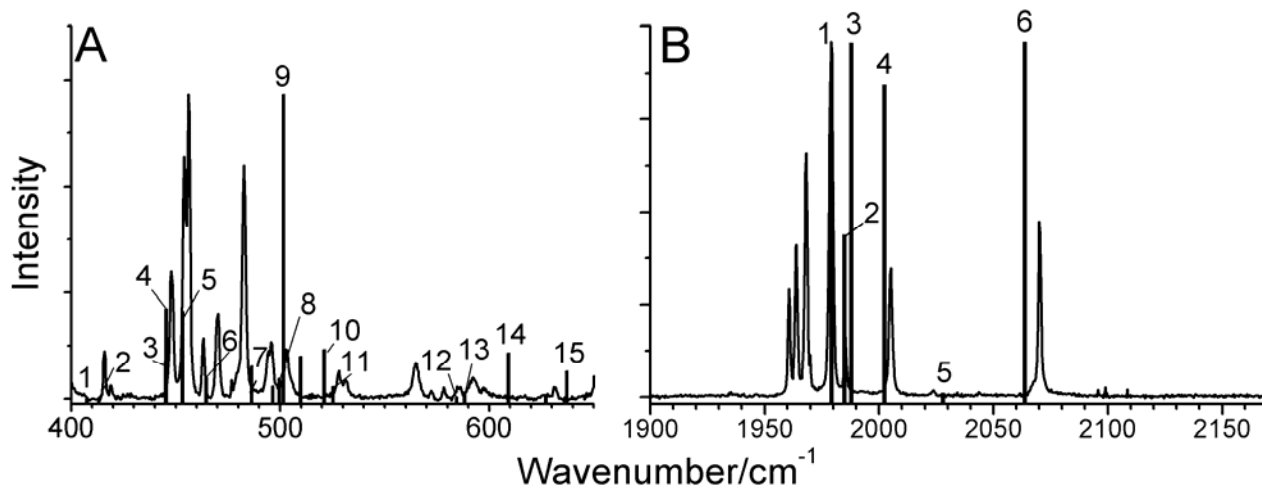

Supplement: NIHMS187453-supplement-1_si_001.pdf [file NIHMS187453-supplement-1_si_001.pdf]
